# Supplementary material
Source: publisher site journal article supplement (https://www.spandidos-publications.com/2430/downloadSupplementary)
Supplement: Supplementary file 1 [file downloadSupplementary]

## Sheet: Pathway
First Category	Second Category	GEO-BPA Number
Human Diseases	Neurodegenerative diseases	14
Environmental Information Processing	Signal transduction	13
Organismal Systems	Immune system	11
Metabolism	Energy metabolism	10
Genetic Information Processing	Translation	9
Cellular Processes	Transport and catabolism	9
Genetic Information Processing	Folding, sorting and degradation	8
Cellular Processes	Cellular community - eukaryotes	8
Human Diseases	Endocrine and metabolic diseases	8
Organismal Systems	Circulatory system	7
Organismal Systems	Nervous system	7
Human Diseases	Cancers: Overview	7
Human Diseases	Cardiovascular diseases	7
Human Diseases	Infectious diseases: Viral	7
Metabolism	Carbohydrate metabolism	5
Metabolism	Glycan biosynthesis and metabolism	5
Cellular Processes	Cell growth and death	5
Organismal Systems	Endocrine system	5
Human Diseases	Substance dependence	5
Metabolism	Global and overview maps	4
Metabolism	Nucleotide metabolism	4
Genetic Information Processing	Transcription	4
Human Diseases	Immune diseases	4
Human Diseases	Infectious diseases: Parasitic	4
Metabolism	Amino acid metabolism	3
Metabolism	Metabolism of cofactors and vitamins	3
Environmental Information Processing	Signaling molecules and interaction	3
Cellular Processes	Cell motility	3
Organismal Systems	Digestive system	3
Human Diseases	Drug resistance: Antineoplastic	3
Human Diseases	Infectious diseases: Bacterial	3
Metabolism	Lipid metabolism	2
Organismal Systems	Aging	2
Organismal Systems	Development	2
Human Diseases	Cancers: Specific types	2
Metabolism	Metabolism of other amino acids	1
Organismal Systems	Environmental adaptation	1
Organismal Systems	Excretory system	1
Organismal Systems	Sensory system	1

## Sheet: KEGG
Table SX. KEGG Analysis of Proteins between GEO-BPA and control group.
pathway ID	Description	GEO-BPA UPDOWN numbers	GEO-BPA UPDOWN proteins
hsa05016	Huntington's disease	11	P21912(hsa:6390);P51970(hsa:4702);Q9UFH2(hsa:8632);Q99643(hsa:6391);P00156(hsa:4519);P04179(hsa:6648);P56381(hsa:514);P00403(hsa:4513);O43181(hsa:4724);A0A1C7CYW8(hsa:196385);P03928(hsa:4509)
hsa00190	Oxidative phosphorylation	10	P21912(hsa:6390);P51970(hsa:4702);Q99643(hsa:6391);G3V325(hsa:9551;hsa:26024;hsa:100526740);P00156(hsa:4519);P56381(hsa:514);P03891(hsa:4536);P00403(hsa:4513);O43181(hsa:4724);P03928(hsa:4509)
hsa05010	Alzheimer's disease	10	D3YTA9(hsa:5534);P21912(hsa:6390);P51970(hsa:4702);Q99643(hsa:6391);P00156(hsa:4519);P56381(hsa:514);P00403(hsa:4513);O43181(hsa:4724);B7Z4M1(hsa:10313);P03928(hsa:4509)
hsa05012	Parkinson's disease	9	P21912(hsa:6390);P51970(hsa:4702);Q99643(hsa:6391);P00156(hsa:4519);P56381(hsa:514);P03891(hsa:4536);P00403(hsa:4513);O43181(hsa:4724);P03928(hsa:4509)
hsa04144	Endocytosis	7	Q9Y3C0(hsa:51019);O75886(hsa:10254);Q96P48(hsa:116985);Q9NP61(hsa:26286);Q9Y6D6(hsa:10565);Q5SW96(hsa:26119);Q9Y6D5(hsa:10564)
hsa04932	Non-alcoholic fatty liver disease (NAFLD)	6	P21912(hsa:6390);P51970(hsa:4702);Q99643(hsa:6391);P00156(hsa:4519);P00403(hsa:4513);O43181(hsa:4724)
hsa04510	Focal adhesion	5	P04004(hsa:7448);P12814(hsa:87);P61224(hsa:5908);P15153(hsa:5880);P02452(hsa:1277)
hsa04610	Complement and coagulation cascades	5	P04004(hsa:7448);A0A0A0MRJ7(hsa:2153);P08697(hsa:5345);P02675(hsa:2244);A0A0G2JPR0(hsa:100293534;hsa:720;hsa:721)
hsa01200	Carbon metabolism	4	P21912(hsa:6390);Q16798(hsa:10873);G3V2Y4(hsa:6472);Q99643(hsa:6391)
hsa00230	Purine metabolism	4	Q14432(hsa:5139);P54819(hsa:204);H0YNJ6(hsa:51292);O43306(hsa:112)
hsa03040	Spliceosome	4	P62304(hsa:6635);O60231(hsa:8449);J3KR35(hsa:151903);Q13242(hsa:8683)
hsa03015	mRNA surveillance pathway	4	O43148(hsa:8731);Q9UPR3(hsa:23381);Q9H361(hsa:5042);H0YJ75(hsa:5527)
hsa04024	cAMP signaling pathway	4	Q14432(hsa:5139);P61224(hsa:5908);P15153(hsa:5880);O43306(hsa:112)
hsa04260	Cardiac muscle contraction	4	P00403(hsa:4513);P68133(hsa:72;hsa:70;hsa:58);P00156(hsa:4519);P67936(hsa:7171)
hsa04261	Adrenergic signaling in cardiomyocytes	4	H0YJ75(hsa:5527);P68133(hsa:72;hsa:70;hsa:58);P67936(hsa:7171);O43306(hsa:112)
hsa04611	Platelet activation	4	P02452(hsa:1277);P02675(hsa:2244);P61224(hsa:5908);O43306(hsa:112)
hsa04723	Retrograde endocannabinoid signaling	4	P03891(hsa:4536);O43181(hsa:4724);P51970(hsa:4702);O43306(hsa:112)
hsa05322	Systemic lupus erythematosus	4	P12814(hsa:87);A0A0G2JPR0(hsa:100293534;hsa:720;hsa:721);Q8IUE6(hsa:317772);P62805(hsa:8366;hsa:8359;hsa:8370;hsa:8361;hsa:8368)
hsa00510	N-Glycan biosynthesis	3	O60512(hsa:8703);P26572(hsa:4245);P46977(hsa:3703)
hsa04141	Protein processing in endoplasmic reticulum	3	Q16611(hsa:578);P51571(hsa:6748);P46977(hsa:3703)
hsa03013	RNA transport	3	Q6I9Y2(hsa:80145);Q96HA1(hsa:9883);Q9H361(hsa:5042)
hsa03010	Ribosome	3	P84098(hsa:6143);O75394(hsa:9553);Q9BYD1(hsa:28998)
hsa04015	Rap1 signaling pathway	3	P61224(hsa:5908);P15153(hsa:5880);O43306(hsa:112)
hsa04010	MAPK signaling pathway	3	D3YTA9(hsa:5534);P61224(hsa:5908);P15153(hsa:5880)
hsa04151	PI3K-Akt signaling pathway	3	P04004(hsa:7448);P02452(hsa:1277);H0YJ75(hsa:5527)
hsa04022	cGMP-PKG signaling pathway	3	D3YTA9(hsa:5534);Q14432(hsa:5139);O43306(hsa:112)
hsa04071	Sphingolipid signaling pathway	3	Q86VZ5(hsa:259230);P15153(hsa:5880);H0YJ75(hsa:5527)
hsa04114	Oocyte meiosis	3	D3YTA9(hsa:5534);H0YJ75(hsa:5527);O43306(hsa:112)
hsa04810	Regulation of actin cytoskeleton	3	P12814(hsa:87);P15153(hsa:5880);Q86VI3(hsa:128239)
hsa04270	Vascular smooth muscle contraction	3	O43306(hsa:112);P68133(hsa:72;hsa:70;hsa:58);P14649(hsa:140465)
hsa04924	Renin secretion	3	Q14432(hsa:5139);D3YTA9(hsa:5534);O43306(hsa:112)
hsa04921	Oxytocin signaling pathway	3	D3YTA9(hsa:5534);O43306(hsa:112);P14649(hsa:140465)
hsa04670	Leukocyte transendothelial migration	3	P12814(hsa:87);P61224(hsa:5908);P15153(hsa:5880)
hsa04062	Chemokine signaling pathway	3	P61224(hsa:5908);P15153(hsa:5880);O43306(hsa:112)
hsa05203	Viral carcinogenesis	3	Q16611(hsa:578);P12814(hsa:87);P62805(hsa:8366;hsa:8359;hsa:8370;hsa:8361;hsa:8368)
hsa05414	Dilated cardiomyopathy	3	P68133(hsa:72;hsa:70;hsa:58);P67936(hsa:7171);O43306(hsa:112)
hsa05418	Fluid shear stress and atherosclerosis	3	Q14145(hsa:9817);P36894(hsa:657);P15153(hsa:5880)
hsa05166	HTLV-I infection	3	D3YTA9(hsa:5534);Q9Y4A5(hsa:8295);O43306(hsa:112)
hsa00020	Citrate cycle (TCA cycle)	2	P21912(hsa:6390);Q99643(hsa:6391)
hsa00514	Other types of O-glycan biosynthesis	2	O60512(hsa:8703);Q9H488(hsa:23509)
hsa00515	Mannose type O-glycan biosynthesis	2	O60512(hsa:8703);O43505(hsa:11041)
hsa03050	Proteasome	2	P55036(hsa:5710);O00487(hsa:10213)
hsa04120	Ubiquitin mediated proteolysis	2	Q14145(hsa:9817);Q5GLZ8(hsa:26091)
hsa04310	Wnt signaling pathway	2	D3YTA9(hsa:5534);P15153(hsa:5880)
hsa04014	Ras signaling pathway	2	P61224(hsa:5908);P15153(hsa:5880)
hsa04370	VEGF signaling pathway	2	D3YTA9(hsa:5534);P15153(hsa:5880)
hsa04512	ECM-receptor interaction	2	P04004(hsa:7448);P02452(hsa:1277)
hsa04215	Apoptosis - multiple species	2	Q16611(hsa:578);Q9NR28(hsa:56616)
hsa04210	Apoptosis	2	Q16611(hsa:578);Q9NR28(hsa:56616)
hsa04530	Tight junction	2	P12814(hsa:87);P14649(hsa:140465)
hsa04520	Adherens junction	2	P12814(hsa:87);P15153(hsa:5880)
hsa04211	Longevity regulating pathway	2	P04179(hsa:6648);O43306(hsa:112)
hsa04213	Longevity regulating pathway - multiple species	2	P04179(hsa:6648);O43306(hsa:112)
hsa04360	Axon guidance	2	D3YTA9(hsa:5534);P15153(hsa:5880)
hsa04972	Pancreatic secretion	2	P61224(hsa:5908);O43306(hsa:112)
hsa04918	Thyroid hormone synthesis	2	P22352(hsa:2878);O43306(hsa:112)
hsa04650	Natural killer cell mediated cytotoxicity	2	D3YTA9(hsa:5534);P15153(hsa:5880)
hsa04662	B cell receptor signaling pathway	2	D3YTA9(hsa:5534);P15153(hsa:5880)
hsa04720	Long-term potentiation	2	D3YTA9(hsa:5534);P61224(hsa:5908)
hsa04724	Glutamatergic synapse	2	D3YTA9(hsa:5534);O43306(hsa:112)
hsa05205	Proteoglycans in cancer	2	P04004(hsa:7448);P01344(hsa:3481)
hsa05200	Pathways in cancer	2	P15153(hsa:5880);O43306(hsa:112)
hsa05410	Hypertrophic cardiomyopathy (HCM)	2	P68133(hsa:72;hsa:70;hsa:58);P67936(hsa:7171)
hsa05146	Amoebiasis	2	P02452(hsa:1277);P12814(hsa:87)
hsa05144	Malaria	2	P69905(hsa:3039;hsa:3040);P04921(hsa:2995)
hsa05168	Herpes simplex infection	2	P05114(hsa:3150);Q13242(hsa:8683)
hsa05169	Epstein-Barr virus infection	2	P55036(hsa:5710);O00487(hsa:10213)
hsa05032	Morphine addiction	2	Q14432(hsa:5139);O43306(hsa:112)
hsa05034	Alcoholism	2	Q8IUE6(hsa:317772);P62805(hsa:8366;hsa:8359;hsa:8370;hsa:8361;hsa:8368)
hsa00260	Glycine, serine and threonine metabolism	1	G3V2Y4(hsa:6472)
hsa00360	Phenylalanine metabolism	1	P14174(hsa:4282)
hsa00350	Tyrosine metabolism	1	P14174(hsa:4282)
hsa00330	Arginine and proline metabolism	1	P06732(hsa:1158)
hsa00630	Glyoxylate and dicarboxylate metabolism	1	G3V2Y4(hsa:6472)
hsa00520	Amino sugar and nucleotide sugar metabolism	1	P34949(hsa:4351)
hsa00051	Fructose and mannose metabolism	1	P34949(hsa:4351)
hsa00620	Pyruvate metabolism	1	Q16798(hsa:10873)
hsa01230	Biosynthesis of amino acids	1	G3V2Y4(hsa:6472)
hsa00601	Glycosphingolipid biosynthesis - lacto and neolacto series	1	O60512(hsa:8703)
hsa00533	Glycosaminoglycan biosynthesis - keratan sulfate	1	O60512(hsa:8703)
hsa00600	Sphingolipid metabolism	1	Q86VZ5(hsa:259230)
hsa00590	Arachidonic acid metabolism	1	P22352(hsa:2878)
hsa00760	Nicotinate and nicotinamide metabolism	1	Q9HAN9(hsa:64802)
hsa00730	Thiamine metabolism	1	P54819(hsa:204)
hsa00670	One carbon pool by folate	1	G3V2Y4(hsa:6472)
hsa00480	Glutathione metabolism	1	P22352(hsa:2878)
hsa03018	RNA degradation	1	Q9H361(hsa:5042)
hsa04152	AMPK signaling pathway	1	H0YJ75(hsa:5527)
hsa04150	mTOR signaling pathway	1	Q9Y2Q5(hsa:28956)
hsa04020	Calcium signaling pathway	1	D3YTA9(hsa:5534)
hsa04630	Jak-STAT signaling pathway	1	O75886(hsa:10254)
hsa04390	Hippo signaling pathway	1	P36894(hsa:657)
hsa04350	TGF-beta signaling pathway	1	P36894(hsa:657)
hsa04068	FoxO signaling pathway	1	P04179(hsa:6648)
hsa04371	Apelin signaling pathway	1	O43306(hsa:112)
hsa04072	Phospholipase D signaling pathway	1	O43306(hsa:112)
hsa04060	Cytokine-cytokine receptor interaction	1	P36894(hsa:657)
hsa04550	Signaling pathways regulating pluripotency of stem cells	1	P36894(hsa:657)
hsa04540	Gap junction	1	O43306(hsa:112)
hsa04142	Lysosome	1	C9JIZ6(hsa:5660)
hsa04146	Peroxisome	1	P04179(hsa:6648)
hsa04380	Osteoclast differentiation	1	D3YTA9(hsa:5534)
hsa04970	Salivary secretion	1	O43306(hsa:112)
hsa04971	Gastric acid secretion	1	O43306(hsa:112)
hsa04974	Protein digestion and absorption	1	P02452(hsa:1277)
hsa04976	Bile secretion	1	O43306(hsa:112)
hsa04915	Estrogen signaling pathway	1	O43306(hsa:112)
hsa04925	Aldosterone synthesis and secretion	1	O43306(hsa:112)
hsa04923	Regulation of lipolysis in adipocytes	1	O43306(hsa:112)
hsa04922	Glucagon signaling pathway	1	D3YTA9(hsa:5534)
hsa04912	GnRH signaling pathway	1	O43306(hsa:112)
hsa04911	Insulin secretion	1	O43306(hsa:112)
hsa04916	Melanogenesis	1	O43306(hsa:112)
hsa04914	Progesterone-mediated oocyte maturation	1	O43306(hsa:112)
hsa04913	Ovarian steroidogenesis	1	O43306(hsa:112)
hsa04713	Circadian entrainment	1	O43306(hsa:112)
hsa04962	Vasopressin-regulated water reabsorption	1	O43306(hsa:112)
hsa04961	Endocrine and other factor-regulated calcium reabsorption	1	O43306(hsa:112)
hsa04659	Th17 cell differentiation	1	D3YTA9(hsa:5534)
hsa04658	Th1 and Th2 cell differentiation	1	D3YTA9(hsa:5534)
hsa04664	Fc epsilon RI signaling pathway	1	P15153(hsa:5880)
hsa04666	Fc gamma R-mediated phagocytosis	1	P15153(hsa:5880)
hsa04660	T cell receptor signaling pathway	1	D3YTA9(hsa:5534)
hsa04722	Neurotrophin signaling pathway	1	P61224(hsa:5908)
hsa04725	Cholinergic synapse	1	O43306(hsa:112)
hsa04727	GABAergic synapse	1	O43306(hsa:112)
hsa04728	Dopaminergic synapse	1	H0YJ75(hsa:5527)
hsa04750	Inflammatory mediator regulation of TRP channels	1	O43306(hsa:112)
hsa04742	Taste transduction	1	O43306(hsa:112)
hsa05231	Choline metabolism in cancer	1	P15153(hsa:5880)
hsa05206	MicroRNAs in cancer	1	Q16611(hsa:578)
hsa05212	Pancreatic cancer	1	P15153(hsa:5880)
hsa05210	Colorectal cancer	1	P15153(hsa:5880)
hsa05211	Renal cell carcinoma	1	P61224(hsa:5908)
hsa05412	Arrhythmogenic right ventricular cardiomyopathy (ARVC)	1	Q08043(hsa:89)
hsa05416	Viral myocarditis	1	P15153(hsa:5880)
hsa01522	Endocrine resistance	1	O43306(hsa:112)
hsa01523	Antifolate resistance	1	G3V2Y4(hsa:6472)
hsa01524	Platinum drug resistance	1	Q16611(hsa:578)
hsa04931	Insulin resistance	1	Q15257(hsa:5524)
hsa04933	AGE-RAGE signaling pathway in diabetic complications	1	P02452(hsa:1277)
hsa05150	Staphylococcus aureus infection	1	A0A0G2JPR0(hsa:100293534;hsa:720;hsa:721)
hsa05133	Pertussis	1	A0A0G2JPR0(hsa:100293534;hsa:720;hsa:721)
hsa05110	Vibrio cholerae infection	1	P24390(hsa:10945)
hsa05152	Tuberculosis	1	D3YTA9(hsa:5534)
hsa05143	African trypanosomiasis	1	P69905(hsa:3039;hsa:3040)
hsa05014	Amyotrophic lateral sclerosis (ALS)	1	D3YTA9(hsa:5534)
hsa05031	Amphetamine addiction	1	D3YTA9(hsa:5534)
